# Supplementary material for: Prognostic value of TIGIT in East Asian patients with solid cancers: A systematic review, meta-analysis and pancancer analysis
Source: PubMed Central journal article supplement (PMC9532506; doi:10.3389/fimmu.2022.977016), 2022-09-21
Supplement: DataSheet_1.pdf [file DataSheet_1.pdf]

## Supplementary materials

Table 1 English literature retrieval strategy(Pubmed)

| Number | Search terms                                                      |
|--------|-------------------------------------------------------------------|
| 1      | TIGIT [Title/Abstract]                                            |
| 2      | T-cell Ig and ITIM domain [Title/Abstract]                        |
| 3      | Vstm3[Title/Abstract]                                             |
| 4      | WUCAM [Title/Abstract]                                            |
| 5      | VSIG9[Title/Abstract]                                             |
| 6      | 1 OR 2 OR 3 OR 4 OR 5                                             |
| 7      | Carcinoma [Title/Abstract]                                        |
| 8      | Carcinoma[MeSH]                                                   |
| 9      | Neoplasms[Title/Abstract]                                         |
| 10     | Neoplasms[MeSH]                                                   |
| 11     | cancer [Title/Abstract]                                           |
| 12     | neoplasia [Title/Abstract]                                        |
| 13     | Tumor [Title/Abstract]                                            |
| 14     | malignancy [Title/Abstract]                                       |
| 15     | malignant neoplasm (Full text)                                    |
| 16     | 7 OR 8 OR 9 OR 10 OR 11 OR 12 OR 13 OR 14 OR 15                   |
| 17     | Prognosis [MeSH]                                                  |
| 18     | Prognosis [Title/Abstract]                                        |
| 19     | Survival Analysis [MeSH]                                          |
| 20     | Survival Analysis [Title/Abstract]                                |
| 21     | Prognostic [Title/Abstract]                                       |
| 22     | Treatment Outcome [MeSH]                                          |
| 23     | Treatment Outcome [Title/Abstract]                                |
| 24     | Fatal Outcome [MeSH]                                              |
| 25     | Fatal Outcome [Title/Abstract]                                    |
| 26     | Mortality [MeSH]                                                  |
| 27     | Mortality [Title/Abstract]                                        |
| 28     | 17 OR 18 OR 19 OR 20 OR 21 OR 22 OR 23 OR 24 OR<br>25 OR 26 OR 27 |
| 29     | 6 AND 16 AND 28                                                   |

Table 2 literature search strategy(Embase)

| Number | Search terms                               |
|--------|--------------------------------------------|
| 1      | TIGIT [Title/Abstract]                     |
| 2      | T-cell Ig and ITIM domain [Title/Abstract] |
| 3      | Vstm3[Title/Abstract]                      |

|    |                                     |
|----|-------------------------------------|
| 4  | WUCAM [Title/Abstract]              |
| 5  | VSIG9[Title/Abstract]               |
| 6  | 1 OR 2 OR 3 OR 4 OR 5               |
| 7  | Carcinoma [Title/Abstract]          |
| 8  | Neoplasms[Title/Abstract]           |
| 9  | cancer [Title/Abstract]             |
| 10 | neoplasia [Title/Abstract]          |
| 11 | Tumor [Title/Abstract]              |
| 12 | malignancy [Title/Abstract]         |
| 13 | malignant neoplasm [Title/Abstract] |
| 14 | 7 OR 8 OR 9 OR 10 OR 11 OR 12 OR 13 |
| 15 | Prognos* [Title/Abstract]           |
| 16 | Survival Analysis [Title/Abstract]  |
| 17 | Treatment Outcome [Title/Abstract]  |
| 18 | Fatal Outcome [Title/Abstract]      |
| 19 | Mortality [Title/Abstract]          |
| 20 | 15 OR 16 OR 17 OR 18 OR 19          |
| 21 | 6 AND 14 AND 20                     |

Table 3 Literature search strategy(Cochrane library)

| Number | Search terms                                       |
|--------|----------------------------------------------------|
| 1      | TIGIT [Title Abstract Keyword]                     |
| 2      | T-cell Ig and ITIM domain [Title Abstract Keyword] |
| 3      | Vstm3[Title Abstract Keyword]                      |
| 4      | WUCAM [Title Abstract Keyword]                     |
| 5      | VSIG9[Title Abstract Keyword]                      |
| 6      | 1 OR 2 OR 3 OR 4 OR 5                              |
| 7      | Carcinoma [Title Abstract Keyword]                 |
| 8      | Neoplasms[Title Abstract Keyword]                  |
| 9      | cancer [Title Abstract Keyword]                    |
| 10     | neoplasia [Title Abstract Keyword]                 |
| 11     | Tumor [Title Abstract Keyword]                     |
| 12     | malignancy [Title Abstract Keyword]                |
| 13     | malignant neoplasm [Title Abstract Keyword]        |
| 14     | 7 OR 8 OR 9 OR 10 OR 11 OR 12 OR 13                |
| 15     | Prognos* [Title Abstract Keyword]                  |
| 16     | Survival Analysis [Title Abstract Keyword]         |
| 17     | Treatment Outcome [Title Abstract Keyword]         |
| 18     | Fatal Outcome [Title Abstract Keyword]             |
| 19     | Mortality [Title Abstract Keyword]                 |
| 20     | 15 OR 16 OR 17 OR 18 OR 19                         |

Table 4 Quality assessment of included studies according to the Newcastle-Ottawa Scale.

| Study                    | Selection |    |    |    | Comparability |    | Outcome |    |    | In total |
|--------------------------|-----------|----|----|----|---------------|----|---------|----|----|----------|
|                          | 1*        | 2* | 3* | 4* | 5*            | 6* | 7*      | 8* | 9* |          |
| Zhao JJ 2018             | 1         | 1  | 1  | 1  | 1             | 0  | 1       | 1  | 1  | 8        |
| Tang W 2019              | 1         | 1  | 1  | 1  | 1             | 0  | 1       | 1  | 1  | 8        |
| Xu Y 2019                | 1         | 1  | 1  | 1  | 1             | 0  | 1       | 0  | 0  | 6        |
| Lee WJ 2020              | 1         | 1  | 1  | 1  | 1             | 0  | 1       | 0  | 1  | 7        |
| Sun Y 2020               | 1         | 1  | 1  | 1  | 1             | 0  | 1       | 0  | 1  | 7        |
| Zhao K 2020              | 1         | 1  | 1  | 1  | 1             | 0  | 1       | 1  | 1  | 8        |
| Zhou X 2020              | 1         | 1  | 1  | 1  | 1             | 0  | 1       | 1  | 1  | 8        |
| Liang R 2021             | 1         | 1  | 1  | 1  | 1             | 0  | 1       | 0  | 0  | 6        |
| Liu HF 2022              | 1         | 1  | 1  | 1  | 1             | 0  | 1       | 1  | 0  | 7        |
| Wang PP 2021             | 1         | 1  | 1  | 1  | 1             | 0  | 1       | 1  | 1  | 8        |
| Daisuke Murakami<br>2022 | 1         | 1  | 1  | 1  | 1             | 0  | 1       | 0  | 1  | 7        |
| Jiang C 2022             | 1         | 1  | 1  | 1  | 1             | 0  | 1       | 1  | 1  | 8        |
| Yu LH 2021               | 1         | 1  | 1  | 1  | 1             | 0  | 1       | 1  | 1  | 8        |
| Shi X 2021               | 1         | 1  | 1  | 1  | 1             | 0  | 1       | 1  | 1  | 8        |
| Liu ZP 2020              | 1         | 1  | 1  | 1  | 1             | 0  | 1       | 1  | 1  | 8        |
| Luo Y 2022               | 1         | 1  | 1  | 1  | 1             | 0  | 1       | 1  | 0  | 7        |

1\*: Representativeness of the exposed cohort, 2\*: Selection of the non exposed cohort, 3\*: Ascertainment of exposure, 4\*: Demonstration that outcome of interest was not present at start of study, 5\*: Study controls for the most important factor, 6\*: Study controls for any additional factor, 7\*: Assessment of outcome, 8\*: Was follow-up long enough for outcomes to occur, 9\*: Adequacy of follow up of cohorts.

Table 5 Differential TIGIT mRNA expression in 12 kinds of cancers and normal tissues

| Cancer type | Tumor      | Normal     | P value    |
|-------------|------------|------------|------------|
| LUAD        | 1.44±1.33  | 0.46±1.12  | p=1.5e-32  |
| ESCA        | 0.29±1.59  | -2.88±2.23 | p=3.7e-59  |
| STES        | 0.71±1.57  | -2.60±2.18 | p=4.8e-156 |
| COADREAD    | -0.03±1.60 | -1.93±2.39 | p=4.2e-29  |
| LIHC        | -1.18±1.86 | -1.71±1.23 | p=3.4e-3   |
| SKCM        | -0.10±2.07 | -2.56±1.70 | p=3.7e-27  |
| THCA        | -0.53±2.05 | -0.95±2.03 | p=1.2e-4   |
| COAD        | 0.01±1.62  | -2.00±2.38 | p=4.7e-28  |
| STAD        | 0.89±1.53  | -1.74±1.76 | p=1.8e-54  |
| READ        | -0.16±1.55 | 0.46±1.04  | P=0.11     |
| LUSC        | 1.25±1.36  | 0.46±1.12  | p=1.1e-22  |
| BLCA        | 0.12±1.98  | -0.89±3.04 | P=0.09     |

Table 6 TIGIT expression in patients with wild type or SNV

| Cancer type | Wild type   | Mutation type | P value |
|-------------|-------------|---------------|---------|
| LUAD        | 1.44±1.32   | 1.55±1.50     | 0.75    |
| COAD        | 8.1e-3±1.63 | -0.13±1.97    | 0.91    |
| COADREAD    | -0.04±1.62  | -0.10±1.54    | 0.92    |
| BRCA        | 0.64±1.93   | 2.27±1.27     | 0.11    |
| STES        | 0.69±1.57   | 1.24±1.82     | 0.59    |
| STAD        | 0.87±1.52   | 1.92±1.50     | 0.27    |

Table 7 TIGIT expression in patients with with or without CNV

| Cancer type                         | Observation group(Mean±std) | control group(Mean±std) | P value for wilcoxon rank sum test | P value for Kruskal-Wallis rank sum test |
|-------------------------------------|-----------------------------|-------------------------|------------------------------------|------------------------------------------|
| LUAD(Gain=20,Neutral=481,Loss=10)   | Gain(1.28±1.24)             | Neutral(1.45±1.33)      | 0.55                               | 0.76                                     |
|                                     | Gain(1.28±1.24)             | Loss(1.34±1.29)         | 0.91                               |                                          |
|                                     | Neutral(1.45±1.33)          | Loss(1.34±1.29)         | 0.66                               |                                          |
| COADREAD(Neutral=372,Loss=3)        | Neutral(-0.03±1.61)         | Loss(-0.59±1.43)        | 0.43                               | 0.43                                     |
| BRCA(Neutral=1004, Gain=52,Loss=27) | Neutral(0.60±1.93)          | Gain(0.97±1.84)         | 0.07                               | 0.2                                      |
|                                     | Neutral(0.60±1.93)          | Loss(0.49±2.10)         | 0.94                               |                                          |
|                                     | Gain(0.97±1.84)             | Loss(0.49±2.10)         | 0.24                               |                                          |
| ESCA(Neutral=160,Loss=6,Gain=14)    | Neutral(0.31±1.60)          | Loss(-0.20±1.35)        | 0.38                               | 0.62                                     |
|                                     | Neutral(0.31±1.60)          | Gain(0.24±1.64)         | 0.64                               |                                          |
|                                     | Loss(-0.20±1.35)            | Gain(0.24±1.64)         | 0.84                               |                                          |
| STES(Neutral=552,Loss=16,Gain=23)   | Neutral(0.73±1.57)          | Loss(0.55±1.42)         | 0.61                               | 0.09                                     |
|                                     | Neutral(0.73±1.57)          | Gain(0.16±1.59)         | 0.03                               |                                          |
|                                     | Loss(0.55±1.42)             | Gain(0.16±1.59)         | 0.25                               |                                          |
| STAD(Neutral=392,Gain=9,Loss=10)    | Neutral(0.90±1.53)          | Gain(0.05±1.60)         | 0.04                               | 0.11                                     |
|                                     | Neutral(0.90±1.53)          | Loss(1.00±1.32)         | 0.88                               |                                          |
|                                     | Gain(0.05±1.60)             | Loss(1.00±1.32)         | 0.08                               |                                          |
| LUSC(Neutral=415,Lo                 | Neutral(1.34±1.33)          | Loss(1.05±1.50)         | 0.24                               | 4.40e-03                                 |

|                                   |                     |                  |          |      |
|-----------------------------------|---------------------|------------------|----------|------|
| ss=38,Gain=44)                    | Neutral(1.34±1.33)  | Gain(0.62±1.34)  | 1.50E-03 |      |
|                                   | Loss(1.05±1.50)     | Gain(0.62±1.34)  | 0.26     |      |
| LIHC(Neutral=357,Gain=5,Loss=5)   | Neutral(-1.21±1.85) | Gain(-0.33±2.40) | 0.45     | 0.1  |
|                                   | Neutral(-1.21±1.85) | Loss(0.41±1.40)  | 0.04     |      |
|                                   | Gain(-0.33±2.40)    | Loss(0.41±1.40)  | 0.69     |      |
| SKCM(Neutral=95,Loss=6)           | Neutral(-0.19±2.05) | Loss(1.67±1.64)  | 0.03     | 0.03 |
| BLCA(Neutral=375,Loss=12,Gain=18) | Neutral(0.10±1.99)  | Loss(0.39±1.82)  | 0.57     | 0.77 |
|                                   | Neutral(0.10±1.99)  | Gain(0.19±1.92)  | 0.64     |      |
|                                   | Loss(0.39±1.82)     | Gain(0.19±1.92)  | 0.95     |      |

Table 8 Correlation coefficient between TIGIT expression and immune cell infiltration (CIBERSORT)

| Immune cell                  | LUAD   | ESCA   | STES   | COAD   | COADREAD | STAD   | LUSC   | LIHC   | SKCM   | BLCA   | THCA   | READ   |
|------------------------------|--------|--------|--------|--------|----------|--------|--------|--------|--------|--------|--------|--------|
| B_cells_naive                | -0.019 | 0.300  | 0.231  | 0.187  | 0.202    | 0.152  | 0.062  | 0.191  | 0.210  | 0.361  | 0.532  | 0.259  |
| B_cells_memory               | 0.148  | -0.069 | 0.066  | -0.056 | -0.084   | 0.118  | 0.047  | -0.062 | 0.063  | -0.361 | -0.143 | -0.165 |
| Plasma_cells                 | -0.142 | -0.055 | -0.191 | -0.236 | -0.211   | -0.226 | -0.138 | 0.355  | 0.220  | -0.079 | 0.457  | -0.092 |
| T_cells_CD8                  | 0.412  | 0.451  | 0.460  | 0.331  | 0.355    | 0.438  | 0.391  | 0.419  | 0.697  | 0.370  | 0.105  | 0.431  |
| T_cells_CD4_naive            | NA     | -0.265 | -0.147 | -0.225 | -0.264   | -0.031 | -0.182 | -0.304 | -0.226 | -0.409 | -0.143 | -0.376 |
| T_cells_CD4_memory_resting   | 0.266  | 0.108  | -0.006 | 0.045  | 0.059    | -0.070 | 0.245  | 0.034  | -0.085 | 0.231  | 0.253  | 0.118  |
| T_cells_CD4_memory_activated | 0.368  | 0.407  | 0.419  | 0.079  | 0.048    | 0.422  | 0.393  | 0.232  | 0.468  | 0.521  | 0.125  | -0.056 |
| T_cells_follicular_helper    | 0.114  | 0.149  | 0.120  | 0.193  | 0.179    | 0.118  | 0.068  | 0.313  | 0.212  | 0.065  | 0.186  | 0.134  |
| T_cells_regulatory_(Tregs)   | 0.205  | -0.034 | 0.074  | 0.081  | 0.102    | 0.071  | 0.332  | 0.346  | 0.379  | 0.081  | 0.375  | 0.189  |
| T_cells_gamma_delta          | 0.006  | 0.086  | 0.051  | -0.066 | -0.083   | 0.037  | -0.013 | 0.020  | -0.044 | -0.078 | 0.151  | -0.150 |
| NK_cells_resting             | -0.060 | -0.043 | -0.113 | -0.156 | -0.116   | -0.096 | -0.053 | -0.439 | -0.427 | -0.111 | -0.463 | 0.009  |
| NK_cells_activated           | 0.098  | 0.079  | 0.107  | 0.102  | 0.068    | 0.066  | 0.140  | 0.060  | 0.465  | 0.173  | 0.084  | -0.030 |
| Monocytes                    | -0.004 | 0.044  | 0.013  | -0.017 | -0.015   | -0.013 | 0.064  | -0.339 | 0.076  | -0.125 | -0.342 | -0.011 |
| Macrophages_M0               | -0.074 | -0.231 | -0.295 | -0.213 | -0.201   | -0.298 | -0.146 | -0.035 | -0.344 | -0.053 | 0.013  | -0.150 |
| Macrophages_M1               | 0.514  | 0.534  | 0.399  | 0.471  | 0.481    | 0.330  | 0.385  | 0.282  | 0.563  | 0.560  | 0.577  | 0.531  |
| Macrophages_M2               | -0.201 | -0.164 | -0.104 | 0.131  | 0.146    | -0.089 | -0.111 | -0.200 | -0.398 | 0.014  | -0.364 | 0.206  |

|                               |        |        |        |        |        |        |        |        |        |        |        |        |
|-------------------------------|--------|--------|--------|--------|--------|--------|--------|--------|--------|--------|--------|--------|
| Dendritic_cells_re<br>sting   | 0.125  | 0.147  | 0.182  | 0.083  | 0.100  | 0.207  | 0.001  | 0.191  | 0.227  | 0.044  | 0.369  | 0.141  |
| Dendritic_cells_ac<br>tivated | -0.271 | -0.273 | -0.171 | -0.099 | -0.151 | -0.035 | -0.220 | -0.119 | -0.136 | -0.285 | -0.052 | -0.304 |
| Mast_cells_resting            | -0.036 | 0.239  | 0.143  | 0.275  | 0.269  | 0.093  | 0.057  | -0.496 | -0.282 | -0.057 | -0.314 | 0.277  |
| Mast_cells_activat<br>ed      | -0.149 | -0.303 | -0.301 | -0.314 | -0.270 | -0.306 | -0.215 | 0.123  | -0.017 | -0.072 | -0.051 | -0.182 |
| Eosinophils                   | -0.106 | -0.145 | -0.093 | -0.035 | -0.020 | -0.053 | -0.128 | -0.288 | -0.238 | -0.247 | -0.325 | 0.014  |
| Neutrophils                   | -0.194 | -0.224 | -0.209 | 0.125  | 0.127  | -0.211 | -0.127 | -0.005 | 0.021  | 0.098  | 0.097  | 0.111  |

NA: Not available

Table 9 Correlation coefficient between TIGIT expression and immune related genes

| Gene Type | Gene name | BLCA  | READ  | COAD   | COADREAD | THCA  | SKCM   | LUSC   | ESCA   | STAD   | STES   | LUAD  | LIHC  |
|-----------|-----------|-------|-------|--------|----------|-------|--------|--------|--------|--------|--------|-------|-------|
| chemokine | CCL20     | 0.332 | 0.133 | -0.073 | -0.035   | 0.578 | 0.027  | 0.181  | 0.011  | -0.023 | -0.011 | 0.121 | 0.285 |
| chemokine | CCL24     | 0.504 | 0.138 | -0.086 | -0.040   | 0.519 | 0.116  | 0.242  | 0.110  | 0.088  | 0.120  | 0.250 | 0.329 |
| chemokine | CXCL2     | 0.481 | 0.245 | 0.114  | 0.140    | 0.459 | 0.177  | 0.194  | 0.167  | 0.053  | 0.117  | 0.148 | 0.119 |
| chemokine | CXCL1     | 0.408 | 0.274 | 0.203  | 0.220    | 0.513 | 0.024  | -0.001 | -0.015 | 0.058  | 0.027  | 0.180 | 0.300 |
| chemokine | CXCL3     | 0.456 | 0.170 | 0.098  | 0.113    | 0.441 | 0.072  | 0.161  | 0.049  | 0.069  | 0.107  | 0.136 | 0.351 |
| chemokine | CXCL5     | 0.451 | 0.443 | 0.208  | 0.259    | 0.492 | 0.075  | 0.154  | 0.009  | 0.005  | 0.047  | 0.037 | 0.277 |
| chemokine | CXCL6     | 0.318 | 0.359 | 0.275  | 0.287    | 0.395 | -0.006 | 0.004  | 0.041  | -0.047 | -0.070 | 0.198 | 0.248 |
| chemokine | CCL26     | 0.390 | 0.235 | 0.254  | 0.249    | 0.298 | 0.098  | -0.059 | 0.071  | 0.110  | 0.101  | 0.258 | 0.266 |
| chemokine | CXCL8     | 0.310 | 0.434 | 0.319  | 0.347    | 0.489 | -0.002 | -0.050 | 0.042  | -0.017 | -0.012 | 0.042 | 0.287 |
| chemokine | CCL1      | 0.474 | 0.380 | 0.362  | 0.360    | 0.416 | 0.227  | 0.283  | 0.167  | 0.318  | 0.274  | 0.400 | 0.259 |
| chemokine | CX3CL1    | 0.305 | 0.478 | 0.450  | 0.456    | 0.349 | 0.073  | 0.099  | 0.364  | 0.463  | 0.395  | 0.269 | 0.225 |
| chemokine | CCL7      | 0.549 | 0.557 | 0.431  | 0.461    | 0.548 | 0.219  | 0.317  | 0.297  | 0.150  | 0.202  | 0.214 | 0.301 |
| chemokine | CCL11     | 0.445 | 0.496 | 0.488  | 0.483    | 0.505 | 0.127  | 0.337  | 0.279  | 0.389  | 0.385  | 0.406 | 0.329 |

|           |        |        |        |        |        |        |       |        |        |        |        |        |        |
|-----------|--------|--------|--------|--------|--------|--------|-------|--------|--------|--------|--------|--------|--------|
| chemokine | CCL27  | -0.099 | -0.086 | -0.022 | -0.036 | -0.067 | 0.236 | -0.040 | 0.034  | -0.082 | -0.073 | -0.090 | 0.054  |
| chemokine | CXCL17 | -0.026 | 0.002  | 0.083  | 0.069  | 0.513  | 0.001 | 0.075  | 0.081  | 0.037  | 0.043  | -0.007 | 0.178  |
| chemokine | CCL25  | 0.385  | 0.161  | 0.300  | 0.270  | 0.151  | 0.424 | 0.367  | 0.153  | 0.231  | 0.242  | 0.443  | 0.070  |
| chemokine | CCL14  | 0.260  | 0.249  | 0.406  | 0.371  | -0.151 | 0.203 | 0.382  | 0.278  | 0.195  | 0.235  | 0.246  | -0.121 |
| chemokine | CCL16  | 0.052  | 0.174  | 0.137  | 0.144  | -0.118 | 0.125 | 0.267  | 0.251  | 0.058  | 0.143  | 0.198  | -0.166 |
| chemokine | CCL15  | -0.179 | -0.132 | -0.290 | -0.259 | 0.141  | 0.181 | 0.259  | -0.005 | 0.025  | 0.101  | 0.143  | -0.140 |
| chemokine | CCL28  | 0.234  | 0.227  | 0.108  | 0.138  | -0.093 | 0.008 | 0.063  | 0.090  | -0.108 | -0.030 | 0.192  | 0.136  |
| chemokine | CXCL14 | 0.003  | 0.070  | -0.058 | -0.041 | 0.423  | 0.122 | -0.034 | 0.057  | 0.043  | 0.002  | 0.229  | 0.377  |
| chemokine | CCL5   | 0.684  | 0.781  | 0.836  | 0.824  | 0.820  | 0.879 | 0.755  | 0.749  | 0.834  | 0.810  | 0.803  | 0.847  |
| chemokine | CXCL9  | 0.805  | 0.800  | 0.820  | 0.816  | 0.847  | 0.897 | 0.714  | 0.809  | 0.758  | 0.781  | 0.785  | 0.763  |
| chemokine | CXCL13 | 0.782  | 0.777  | 0.796  | 0.792  | 0.830  | 0.889 | 0.617  | 0.769  | 0.780  | 0.783  | 0.714  | 0.584  |
| chemokine | CCL4   | 0.788  | 0.784  | 0.746  | 0.754  | 0.755  | 0.874 | 0.720  | 0.657  | 0.667  | 0.676  | 0.738  | 0.765  |
| chemokine | XCL2   | 0.556  | 0.448  | 0.653  | 0.607  | 0.665  | 0.792 | 0.577  | 0.609  | 0.633  | 0.639  | 0.570  | 0.570  |
| chemokine | CXCL10 | 0.749  | 0.743  | 0.750  | 0.749  | 0.832  | 0.807 | 0.622  | 0.683  | 0.659  | 0.666  | 0.679  | 0.574  |
| chemokine | CXCL11 | 0.694  | 0.677  | 0.572  | 0.595  | 0.805  | 0.772 | 0.579  | 0.675  | 0.586  | 0.619  | 0.644  | 0.579  |
| chemokine | CCL18  | 0.682  | 0.652  | 0.589  | 0.601  | 0.564  | 0.081 | 0.495  | 0.362  | 0.425  | 0.415  | 0.455  | 0.522  |
| chemokine | CCL21  | 0.497  | 0.482  | 0.511  | 0.501  | 0.469  | 0.247 | 0.508  | 0.383  | 0.418  | 0.423  | 0.443  | 0.371  |
| chemokine | CCL17  | 0.284  | 0.389  | 0.545  | 0.506  | 0.570  | 0.188 | 0.335  | 0.336  | 0.445  | 0.403  | 0.313  | 0.370  |
| chemokine | CCL23  | 0.582  | 0.546  | 0.513  | 0.521  | 0.617  | 0.286 | 0.442  | 0.295  | 0.390  | 0.383  | 0.292  | 0.317  |
| chemokine | CXCL16 | 0.529  | 0.541  | 0.379  | 0.414  | 0.608  | 0.510 | 0.409  | 0.201  | 0.255  | 0.273  | 0.120  | 0.237  |
| chemokine | CCL2   | 0.575  | 0.678  | 0.571  | 0.589  | 0.603  | 0.368 | 0.454  | 0.440  | 0.389  | 0.429  | 0.375  | 0.444  |
| chemokine | CXCL12 | 0.453  | 0.674  | 0.481  | 0.518  | 0.514  | 0.460 | 0.475  | 0.294  | 0.346  | 0.359  | 0.438  | 0.333  |
| chemokine | XCL1   | 0.299  | 0.310  | 0.500  | 0.447  | 0.674  | 0.798 | 0.059  | 0.181  | 0.405  | 0.292  | 0.392  | 0.519  |
| chemokine | CCL22  | 0.506  | 0.674  | 0.717  | 0.703  | 0.748  | 0.388 | 0.463  | 0.497  | 0.640  | 0.587  | 0.475  | 0.554  |
| chemokine | CCL19  | 0.625  | 0.573  | 0.691  | 0.663  | 0.781  | 0.492 | 0.644  | 0.561  | 0.629  | 0.622  | 0.693  | 0.531  |
| chemokine | CCL3   | 0.711  | 0.634  | 0.548  | 0.568  | 0.534  | 0.531 | 0.531  | 0.403  | 0.392  | 0.416  | 0.485  | 0.597  |



|           |          |       |       |       |       |       |       |       |       |       |       |       |       |
|-----------|----------|-------|-------|-------|-------|-------|-------|-------|-------|-------|-------|-------|-------|
| chemokine | CCL8     | 0.640 | 0.682 | 0.603 | 0.619 | 0.505 | 0.663 | 0.449 | 0.491 | 0.418 | 0.461 | 0.448 | 0.525 |
| chemokine | CCL13    | 0.601 | 0.683 | 0.598 | 0.615 | 0.618 | 0.408 | 0.385 | 0.383 | 0.459 | 0.436 | 0.352 | 0.515 |
| receptor  | CCR4     | 0.721 | 0.839 | 0.773 | 0.786 | 0.809 | 0.684 | 0.754 | 0.691 | 0.773 | 0.755 | 0.710 | 0.606 |
| receptor  | CCR7     | 0.150 | 0.648 | 0.786 | 0.755 | 0.841 | 0.705 | 0.754 | 0.649 | 0.704 | 0.697 | 0.770 | 0.670 |
| receptor  | CCR1     | 0.593 | 0.750 | 0.686 | 0.698 | 0.705 | 0.630 | 0.636 | 0.679 | 0.638 | 0.664 | 0.517 | 0.655 |
| receptor  | CCR2     | 0.667 | 0.818 | 0.719 | 0.736 | 0.796 | 0.764 | 0.716 | 0.654 | 0.720 | 0.708 | 0.677 | 0.656 |
| receptor  | CCR8     | 0.715 | 0.720 | 0.733 | 0.725 | 0.647 | 0.575 | 0.707 | 0.718 | 0.721 | 0.720 | 0.727 | 0.601 |
| receptor  | XCR1     | 0.230 | 0.522 | 0.637 | 0.610 | 0.785 | 0.703 | 0.547 | 0.457 | 0.646 | 0.591 | 0.513 | 0.663 |
| receptor  | CXCR3    | 0.808 | 0.197 | 0.360 | 0.324 | 0.696 | 0.910 | 0.846 | 0.662 | 0.771 | 0.730 | 0.749 | 0.807 |
| receptor  | CCR5     | 0.810 | 0.895 | 0.901 | 0.899 | 0.861 | 0.882 | 0.843 | 0.832 | 0.870 | 0.857 | 0.836 | 0.834 |
| receptor  | CXCR6    | 0.793 | 0.855 | 0.870 | 0.867 | 0.849 | 0.890 | 0.829 | 0.773 | 0.848 | 0.830 | 0.841 | 0.822 |
| receptor  | CXCR1    | 0.310 | 0.439 | 0.416 | 0.419 | 0.129 | 0.045 | 0.082 | 0.121 | 0.146 | 0.149 | 0.097 | 0.231 |
| receptor  | CXCR2    | 0.001 | 0.521 | 0.393 | 0.416 | 0.470 | 0.130 | 0.117 | 0.054 | 0.111 | 0.074 | 0.208 | 0.282 |
| receptor  | CCR10    | 0.046 | 0.306 | 0.439 | 0.403 | 0.047 | 0.101 | 0.212 | 0.230 | 0.323 | 0.317 | 0.083 | 0.303 |
| receptor  | CXCR5    | 0.208 | 0.105 | 0.228 | 0.204 | 0.283 | 0.356 | 0.276 | 0.169 | 0.298 | 0.234 | 0.299 | 0.211 |
| receptor  | CCR9     | 0.136 | 0.372 | 0.333 | 0.340 | 0.438 | 0.209 | 0.233 | 0.272 | 0.318 | 0.330 | 0.286 | 0.242 |
| receptor  | CCR3     | 0.093 | 0.526 | 0.443 | 0.459 | 0.350 | 0.517 | 0.261 | 0.268 | 0.336 | 0.331 | 0.221 | 0.368 |
| receptor  | CX3CR1   | 0.339 | 0.531 | 0.435 | 0.449 | 0.274 | 0.462 | 0.396 | 0.436 | 0.366 | 0.410 | 0.209 | 0.319 |
| receptor  | CCR6     | 0.614 | 0.142 | 0.309 | 0.271 | 0.637 | 0.502 | 0.526 | 0.292 | 0.366 | 0.367 | 0.533 | 0.383 |
| receptor  | CXCR4    | 0.618 | 0.644 | 0.662 | 0.658 | 0.623 | 0.583 | 0.608 | 0.514 | 0.587 | 0.580 | 0.656 | 0.661 |
| MHC       | HLA-G    | 0.269 | 0.209 | 0.143 | 0.158 | 0.538 | 0.278 | 0.290 | 0.270 | 0.131 | 0.183 | 0.314 | 0.301 |
| MHC       | HLA-DMB  | 0.759 | 0.730 | 0.794 | 0.780 | 0.384 | 0.772 | 0.679 | 0.637 | 0.684 | 0.680 | 0.518 | 0.741 |
| MHC       | HLA-DOB  | 0.681 | 0.617 | 0.682 | 0.668 | 0.818 | 0.715 | 0.580 | 0.569 | 0.649 | 0.612 | 0.575 | 0.630 |
| MHC       | HLA-DOA  | 0.658 | 0.824 | 0.814 | 0.815 | 0.842 | 0.679 | 0.675 | 0.706 | 0.767 | 0.756 | 0.581 | 0.742 |
| MHC       | HLA-DPA1 | 0.743 | 0.829 | 0.812 | 0.815 | 0.845 | 0.760 | 0.694 | 0.682 | 0.697 | 0.702 | 0.536 | 0.719 |
| MHC       | HLA-DPB1 | 0.758 | 0.815 | 0.817 | 0.816 | 0.860 | 0.791 | 0.690 | 0.718 | 0.745 | 0.744 | 0.544 | 0.731 |

|                 |          |        |        |       |       |        |        |        |        |        |        |       |       |
|-----------------|----------|--------|--------|-------|-------|--------|--------|--------|--------|--------|--------|-------|-------|
| MHC             | HLA-DRA  | 0.765  | 0.826  | 0.826 | 0.825 | 0.849  | 0.777  | 0.683  | 0.668  | 0.700  | 0.701  | 0.523 | 0.729 |
| MHC             | HLA-DMA  | 0.618  | 0.596  | 0.721 | 0.694 | 0.801  | 0.728  | 0.677  | 0.533  | 0.572  | 0.577  | 0.408 | 0.592 |
| MHC             | HLA-DQA1 | 0.755  | 0.748  | 0.752 | 0.752 | 0.774  | 0.671  | 0.602  | 0.646  | 0.713  | 0.704  | 0.555 | 0.688 |
| MHC             | HLA-DRB1 | 0.684  | 0.720  | 0.720 | 0.719 | 0.754  | 0.740  | 0.601  | 0.598  | 0.645  | 0.643  | 0.466 | 0.666 |
| MHC             | HLA-E    | 0.633  | 0.648  | 0.571 | 0.586 | 0.674  | 0.656  | 0.613  | 0.583  | 0.614  | 0.594  | 0.559 | 0.483 |
| MHC             | TAP1     | 0.691  | 0.599  | 0.572 | 0.577 | 0.814  | 0.713  | 0.564  | 0.521  | 0.500  | 0.480  | 0.630 | 0.600 |
| MHC             | HLA-F    | 0.603  | 0.382  | 0.458 | 0.443 | 0.762  | 0.716  | 0.620  | 0.513  | 0.419  | 0.460  | 0.598 | 0.431 |
| MHC             | B2M      | 0.657  | 0.597  | 0.546 | 0.558 | 0.716  | 0.668  | 0.616  | 0.535  | 0.461  | 0.492  | 0.561 | 0.463 |
| MHC             | HLA-B    | 0.629  | 0.444  | 0.439 | 0.438 | 0.717  | 0.752  | 0.638  | 0.515  | 0.358  | 0.409  | 0.608 | 0.454 |
| MHC             | HLA-DQA2 | 0.541  | 0.594  | 0.470 | 0.489 | 0.729  | 0.570  | 0.469  | 0.443  | 0.442  | 0.445  | 0.371 | 0.467 |
| MHC             | HLA-DQB1 | 0.575  | 0.283  | 0.484 | 0.445 | 0.489  | 0.584  | 0.432  | 0.470  | 0.523  | 0.520  | 0.354 | 0.556 |
| MHC             | TAP2     | 0.579  | 0.472  | 0.446 | 0.450 | 0.610  | 0.481  | 0.324  | 0.379  | 0.389  | 0.336  | 0.552 | 0.386 |
| MHC             | TAPBP    | 0.519  | 0.330  | 0.395 | 0.383 | 0.459  | 0.529  | 0.385  | 0.372  | 0.486  | 0.426  | 0.430 | 0.343 |
| MHC             | HLA-A    | 0.576  | 0.394  | 0.300 | 0.311 | 0.676  | 0.507  | 0.499  | 0.439  | 0.294  | 0.341  | 0.457 | 0.477 |
| MHC             | HLA-C    | 0.557  | 0.453  | 0.485 | 0.477 | 0.648  | 0.613  | 0.501  | 0.450  | 0.386  | 0.416  | 0.474 | 0.315 |
| Immunoinhibitor | IL10RB   | 0.149  | 0.269  | 0.044 | 0.099 | 0.272  | 0.247  | 0.086  | 0.015  | 0.051  | 0.058  | 0.155 | 0.183 |
| Immunoinhibitor | TGFB1    | 0.195  | 0.552  | 0.597 | 0.588 | 0.261  | 0.132  | 0.039  | 0.227  | 0.462  | 0.331  | 0.411 | 0.446 |
| Immunoinhibitor | KDR      | 0.187  | 0.656  | 0.494 | 0.523 | -0.242 | -0.089 | 0.366  | 0.285  | 0.257  | 0.282  | 0.108 | 0.104 |
| Immunoinhibitor | TGFBR1   | 0.391  | 0.448  | 0.355 | 0.367 | 0.320  | 0.046  | 0.111  | 0.218  | 0.215  | 0.177  | 0.161 | 0.270 |
| Immunoinhibitor | PVRL2    | 0.171  | -0.030 | 0.182 | 0.136 | -0.193 | -0.043 | 0.122  | -0.005 | 0.016  | 0.028  | 0.046 | 0.082 |
| Immunoinhibitor | VTCN1    | -0.071 | -0.008 | 0.081 | 0.064 | 0.450  | 0.079  | -0.160 | -0.019 | -0.152 | -0.149 | 0.031 | 0.196 |
| Immunoinhibitor | TIGIT    | 1.000  | 1.000  | 1.000 | 1.000 | 1.000  | 1.000  | 1.000  | 1.000  | 1.000  | 1.000  | 1.000 | 1.000 |
| Immunoinhibitor | CTLA4    | 0.842  | 0.733  | 0.842 | 0.816 | 0.829  | 0.578  | 0.822  | 0.835  | 0.684  | 0.724  | 0.855 | 0.814 |
| Immunoinhibitor | LAG3     | 0.757  | 0.716  | 0.780 | 0.766 | 0.772  | 0.881  | 0.762  | 0.780  | 0.766  | 0.773  | 0.700 | 0.682 |
| Immunoinhibitor | CD96     | 0.340  | 0.866  | 0.886 | 0.881 | 0.698  | 0.870  | 0.736  | 0.844  | 0.859  | 0.854  | 0.749 | 0.800 |
| Immunoinhibitor | PDCD1    | 0.825  | 0.795  | 0.815 | 0.809 | 0.650  | 0.896  | 0.818  | 0.809  | 0.797  | 0.807  | 0.817 | 0.745 |

|                  |          |        |        |        |        |        |        |        |        |        |        |       |        |
|------------------|----------|--------|--------|--------|--------|--------|--------|--------|--------|--------|--------|-------|--------|
| Immunoinhibitor  | CD244    | 0.476  | 0.665  | 0.733  | 0.718  | 0.736  | 0.645  | 0.669  | 0.661  | 0.728  | 0.716  | 0.674 | 0.676  |
| Immunoinhibitor  | PDCD1LG2 | 0.736  | 0.799  | 0.770  | 0.775  | 0.767  | 0.678  | 0.556  | 0.618  | 0.751  | 0.706  | 0.702 | 0.702  |
| Immunoinhibitor  | CSF1R    | 0.680  | 0.762  | 0.729  | 0.736  | 0.729  | 0.652  | 0.623  | 0.619  | 0.612  | 0.628  | 0.580 | 0.653  |
| Immunoinhibitor  | HAVCR2   | 0.794  | 0.801  | 0.789  | 0.792  | 0.818  | 0.814  | 0.699  | 0.754  | 0.717  | 0.739  | 0.639 | 0.716  |
| Immunoinhibitor  | LGALS9   | 0.402  | 0.380  | 0.306  | 0.326  | 0.719  | 0.560  | 0.578  | 0.255  | 0.391  | 0.375  | 0.421 | 0.568  |
| Immunoinhibitor  | CD160    | 0.410  | 0.529  | 0.444  | 0.466  | 0.387  | 0.382  | 0.495  | 0.356  | 0.380  | 0.382  | 0.463 | 0.479  |
| Immunoinhibitor  | KIR2DL1  | 0.455  | 0.389  | 0.482  | 0.463  | 0.191  | 0.590  | 0.374  | 0.427  | 0.442  | 0.457  | 0.271 | 0.213  |
| Immunoinhibitor  | KIR2DL3  | 0.553  | 0.421  | 0.503  | 0.486  | 0.389  | 0.631  | 0.470  | 0.570  | 0.542  | 0.568  | 0.347 | 0.366  |
| Immunoinhibitor  | ADORA2A  | 0.586  | 0.679  | 0.768  | 0.744  | 0.298  | 0.722  | 0.575  | 0.553  | 0.585  | 0.591  | 0.510 | 0.354  |
| Immunoinhibitor  | BTLA     | 0.729  | 0.569  | 0.623  | 0.612  | 0.821  | 0.774  | 0.738  | 0.704  | 0.734  | 0.732  | 0.796 | 0.707  |
| Immunoinhibitor  | IDO1     | 0.704  | 0.758  | 0.768  | 0.763  | 0.650  | 0.803  | 0.543  | 0.748  | 0.667  | 0.689  | 0.542 | 0.587  |
| Immunoinhibitor  | CD274    | 0.588  | 0.653  | 0.726  | 0.709  | 0.592  | 0.631  | 0.345  | 0.436  | 0.564  | 0.502  | 0.573 | 0.539  |
| Immunoinhibitor  | IL10     | 0.624  | 0.567  | 0.617  | 0.602  | 0.585  | 0.511  | 0.479  | 0.502  | 0.482  | 0.495  | 0.481 | 0.537  |
| Immunostimulator | CD276    | 0.251  | 0.394  | 0.326  | 0.342  | 0.330  | -0.097 | -0.058 | 0.068  | 0.113  | 0.061  | 0.032 | 0.261  |
| Immunostimulator | PVR      | 0.241  | 0.218  | -0.038 | 0.019  | -0.116 | -0.053 | -0.079 | -0.025 | -0.031 | -0.044 | 0.090 | -0.027 |
| Immunostimulator | ULBP1    | 0.143  | 0.296  | -0.151 | -0.031 | -0.028 | -0.013 | -0.075 | -0.064 | -0.099 | -0.150 | 0.137 | 0.197  |
| Immunostimulator | IL6R     | 0.339  | 0.632  | 0.563  | 0.579  | 0.591  | 0.042  | 0.231  | 0.214  | 0.376  | 0.295  | 0.092 | -0.115 |
| Immunostimulator | TNFRSF14 | 0.147  | 0.299  | 0.295  | 0.297  | 0.151  | 0.128  | 0.519  | 0.377  | 0.452  | 0.445  | 0.376 | 0.342  |
| Immunostimulator | TNFSF13  | 0.312  | 0.311  | 0.356  | 0.348  | 0.116  | 0.326  | 0.441  | 0.139  | 0.228  | 0.243  | 0.164 | 0.407  |
| Immunostimulator | ICOSLG   | 0.253  | 0.265  | 0.202  | 0.216  | 0.214  | 0.194  | 0.279  | 0.104  | 0.221  | 0.200  | 0.292 | 0.118  |
| Immunostimulator | TNFSF15  | 0.038  | 0.377  | 0.043  | 0.122  | 0.207  | 0.334  | 0.387  | 0.128  | 0.151  | 0.174  | 0.058 | 0.344  |
| Immunostimulator | IL6      | 0.546  | 0.486  | 0.408  | 0.425  | 0.438  | 0.069  | 0.163  | 0.214  | 0.166  | 0.181  | 0.279 | 0.321  |
| Immunostimulator | TNFSF18  | 0.406  | 0.593  | 0.391  | 0.430  | 0.492  | 0.315  | 0.079  | 0.183  | 0.357  | 0.273  | 0.283 | 0.383  |
| Immunostimulator | NT5E     | 0.308  | 0.285  | 0.180  | 0.203  | 0.360  | 0.149  | 0.116  | 0.022  | 0.094  | 0.068  | 0.154 | 0.130  |
| Immunostimulator | TNFSF9   | 0.336  | -0.052 | 0.216  | 0.166  | 0.533  | 0.133  | 0.003  | 0.011  | 0.194  | 0.123  | 0.089 | 0.438  |
| Immunostimulator | RAET1E   | -0.040 | 0.475  | 0.233  | 0.294  | 0.307  | -0.022 | 0.010  | -0.088 | 0.029  | -0.087 | 0.185 | 0.160  |

|                  |           |        |       |       |       |       |        |        |       |        |       |       |       |
|------------------|-----------|--------|-------|-------|-------|-------|--------|--------|-------|--------|-------|-------|-------|
| Immunostimulator | TNFRSF25  | 0.007  | 0.123 | 0.080 | 0.087 | 0.362 | 0.313  | 0.094  | 0.199 | 0.082  | 0.035 | 0.283 | 0.279 |
| Immunostimulator | BTNL2     | -0.009 | 0.363 | 0.132 | 0.189 | 0.055 | 0.216  | 0.118  | 0.294 | 0.246  | 0.250 | 0.253 | 0.103 |
| Immunostimulator | HHLA2     | 0.265  | 0.258 | 0.014 | 0.054 | 0.246 | 0.338  | 0.186  | 0.022 | -0.012 | 0.057 | 0.144 | 0.277 |
| Immunostimulator | TNFRSF13C | 0.346  | 0.436 | 0.528 | 0.509 | 0.597 | 0.125  | 0.299  | 0.457 | 0.504  | 0.484 | 0.599 | 0.590 |
| Immunostimulator | CXCR4     | 0.618  | 0.644 | 0.662 | 0.658 | 0.623 | 0.583  | 0.608  | 0.514 | 0.587  | 0.580 | 0.656 | 0.661 |
| Immunostimulator | TMIGD2    | 0.262  | 0.424 | 0.349 | 0.368 | 0.582 | 0.616  | 0.574  | 0.379 | 0.502  | 0.473 | 0.563 | 0.395 |
| Immunostimulator | CD70      | 0.650  | 0.313 | 0.479 | 0.445 | 0.629 | 0.428  | 0.407  | 0.356 | 0.419  | 0.393 | 0.563 | 0.707 |
| Immunostimulator | C10orf54  | 0.398  | 0.685 | 0.584 | 0.606 | 0.217 | 0.426  | 0.544  | 0.284 | 0.414  | 0.384 | 0.544 | 0.461 |
| Immunostimulator | TNFRSF8   | 0.632  | 0.740 | 0.786 | 0.773 | 0.313 | 0.643  | 0.602  | 0.582 | 0.583  | 0.588 | 0.651 | 0.755 |
| Immunostimulator | MICB      | 0.474  | 0.424 | 0.507 | 0.489 | 0.652 | 0.225  | 0.419  | 0.411 | 0.433  | 0.407 | 0.484 | 0.370 |
| Immunostimulator | TNFSF4    | 0.568  | 0.639 | 0.617 | 0.621 | 0.535 | 0.340  | 0.543  | 0.565 | 0.526  | 0.551 | 0.515 | 0.217 |
| Immunostimulator | ENTPD1    | 0.572  | 0.693 | 0.659 | 0.660 | 0.028 | 0.414  | 0.597  | 0.576 | 0.498  | 0.532 | 0.549 | 0.526 |
| Immunostimulator | CD40      | 0.361  | 0.596 | 0.590 | 0.589 | 0.487 | 0.427  | 0.385  | 0.506 | 0.537  | 0.537 | 0.563 | 0.310 |
| Immunostimulator | TNFRSF4   | 0.626  | 0.556 | 0.640 | 0.620 | 0.233 | 0.455  | 0.516  | 0.658 | 0.608  | 0.638 | 0.460 | 0.485 |
| Immunostimulator | TNFRSF18  | 0.610  | 0.601 | 0.766 | 0.731 | 0.713 | 0.644  | -0.007 | 0.240 | 0.501  | 0.310 | 0.346 | 0.678 |
| Immunostimulator | CXCL12    | 0.453  | 0.674 | 0.481 | 0.518 | 0.514 | 0.460  | 0.475  | 0.294 | 0.346  | 0.359 | 0.438 | 0.333 |
| Immunostimulator | TMEM173   | 0.486  | 0.338 | 0.306 | 0.314 | 0.439 | -0.019 | 0.317  | 0.294 | 0.426  | 0.368 | 0.171 | 0.507 |
| Immunostimulator | TNFSF14   | 0.649  | 0.802 | 0.783 | 0.787 | 0.748 | 0.770  | 0.627  | 0.534 | 0.640  | 0.615 | 0.457 | 0.104 |
| Immunostimulator | CD27      | 0.835  | 0.818 | 0.848 | 0.841 | 0.298 | 0.931  | 0.781  | 0.779 | 0.808  | 0.805 | 0.772 | 0.904 |
| Immunostimulator | CD48      | 0.803  | 0.877 | 0.839 | 0.846 | 0.887 | 0.855  | 0.727  | 0.813 | 0.806  | 0.807 | 0.697 | 0.842 |
| Immunostimulator | ICOS      | 0.863  | 0.887 | 0.882 | 0.882 | 0.893 | 0.813  | 0.814  | 0.839 | 0.810  | 0.807 | 0.874 | 0.850 |
| Immunostimulator | TNFSF13B  | 0.752  | 0.677 | 0.753 | 0.735 | 0.824 | 0.624  | 0.703  | 0.738 | 0.746  | 0.753 | 0.679 | 0.672 |
| Immunostimulator | KLRK1     | 0.718  | 0.565 | 0.806 | 0.753 | 0.776 | 0.880  | 0.799  | 0.816 | 0.750  | 0.776 | 0.804 | 0.785 |
| Immunostimulator | LTA       | 0.762  | 0.861 | 0.768 | 0.785 | 0.819 | 0.849  | 0.808  | 0.687 | 0.830  | 0.790 | 0.809 | 0.787 |
| Immunostimulator | TNFRSF9   | 0.777  | 0.866 | 0.830 | 0.838 | 0.845 | 0.929  | 0.718  | 0.685 | 0.792  | 0.762 | 0.689 | 0.669 |
| Immunostimulator | CD80      | 0.736  | 0.737 | 0.713 | 0.715 | 0.677 | 0.639  | 0.681  | 0.692 | 0.660  | 0.669 | 0.636 | 0.673 |

|                  |           |       |       |       |       |       |       |       |       |       |       |       |       |
|------------------|-----------|-------|-------|-------|-------|-------|-------|-------|-------|-------|-------|-------|-------|
| Immunostimulator | CD86      | 0.786 | 0.808 | 0.785 | 0.789 | 0.839 | 0.758 | 0.656 | 0.670 | 0.693 | 0.694 | 0.645 | 0.765 |
| Immunostimulator | IL2RA     | 0.806 | 0.816 | 0.833 | 0.827 | 0.739 | 0.606 | 0.677 | 0.707 | 0.743 | 0.736 | 0.700 | 0.736 |
| Immunostimulator | CD28      | 0.768 | 0.783 | 0.764 | 0.766 | 0.838 | 0.529 | 0.723 | 0.765 | 0.727 | 0.746 | 0.723 | 0.641 |
| Immunostimulator | KLRC1     | 0.509 | 0.468 | 0.543 | 0.528 | 0.612 | 0.750 | 0.612 | 0.675 | 0.584 | 0.608 | 0.478 | 0.547 |
| Immunostimulator | CD40LG    | 0.610 | 0.614 | 0.607 | 0.604 | 0.776 | 0.672 | 0.746 | 0.551 | 0.617 | 0.606 | 0.667 | 0.608 |
| Immunostimulator | TNFRSF13B | 0.595 | 0.524 | 0.643 | 0.616 | 0.781 | 0.566 | 0.636 | 0.557 | 0.633 | 0.623 | 0.622 | 0.654 |
| Immunostimulator | TNFRSF17  | 0.582 | 0.584 | 0.654 | 0.637 | 0.653 | 0.632 | 0.592 | 0.523 | 0.587 | 0.581 | 0.524 | 0.659 |

---

Table 10 Correlation between TIGIT expression and TMB

| Cancer Type | Correlation coefficient | P value                  |
|-------------|-------------------------|--------------------------|
| COAD        | R=0.26                  | P=0.00000704129303332121 |
| COADREAD    | R=0.25                  | P=6.40696539541314e-7    |
| STES        | R=0.09                  | P=0.0243863280748041     |
| READ        | R=0.22                  | P=0.0380099918857127     |
| BLCA        | R=0.11                  | P=0.0247453791498405     |
| STAD        | R=0.08                  | P=0.119                  |
| ESCA        | R=0.15                  | P<0.001                  |
| LUAD        | R=0.029                 | P=0.512                  |
| LUSC        | R=-0.001                | P=0.986                  |
| LIHC        | R=-0.060                | P=0.256                  |
| THCA        | R=0.014                 | P=0.755                  |
| SKCM        | R=0.100                 | P=0.315                  |

Table 11 Correlation between TIGIT expression and MSI

| Cancer Type | Correlation coefficient | P value     |
|-------------|-------------------------|-------------|
| COAD        | R=0.26                  | P=0.0000058 |
| COADREAD    | R=0.24                  | P=0.0000020 |
| STES        | R=0.09                  | P=0.024     |
| THCA        | R=0.041                 | P=0.367     |
| BLCA        | R=-0.048                | P=0.335     |
| SKCM        | R=-0.044                | P=0.662     |
| STAD        | R=0.089                 | P=0.072     |
| READ        | R=0.108                 | P=0.315     |
| ESCA        | R=-0.059                | P=0.431     |
| LIHC        | R=-0.050                | P=0.344     |
| LUSC        | R=-0.051                | P=0.262     |
| LUAD        | R=0.056                 | P=0.207     |

A

B

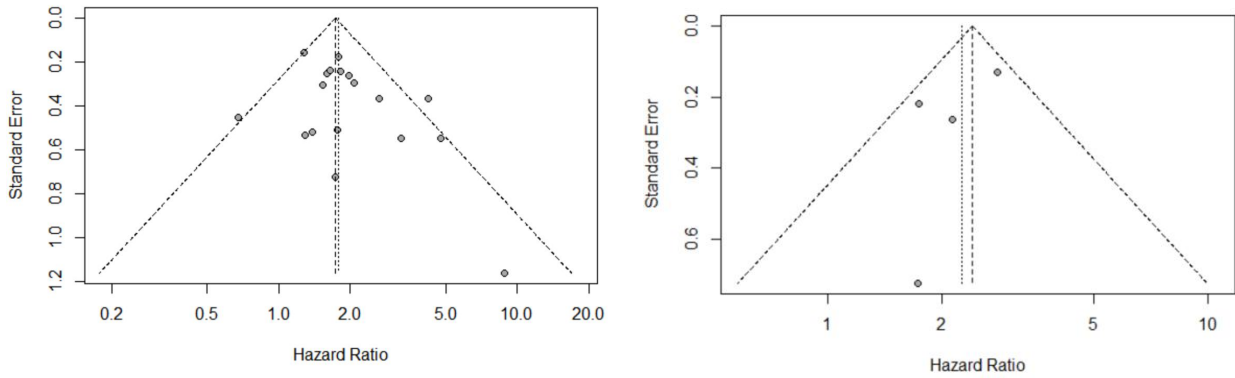

Figure 1 Begg's forest plots (A.OS B. RFS)

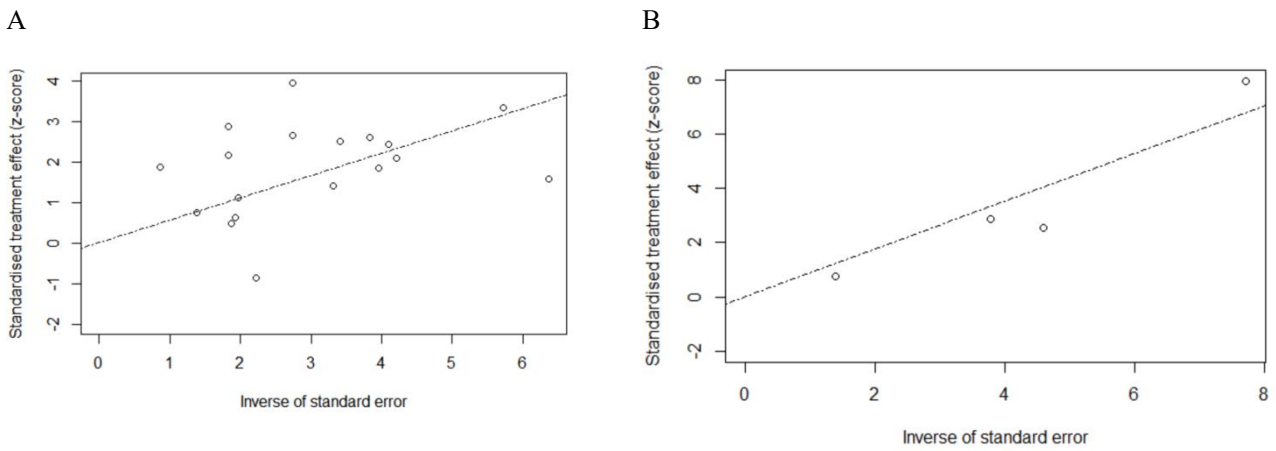

Figure 2 Egger's regression asymmetry plot (A.OS B. RFS)

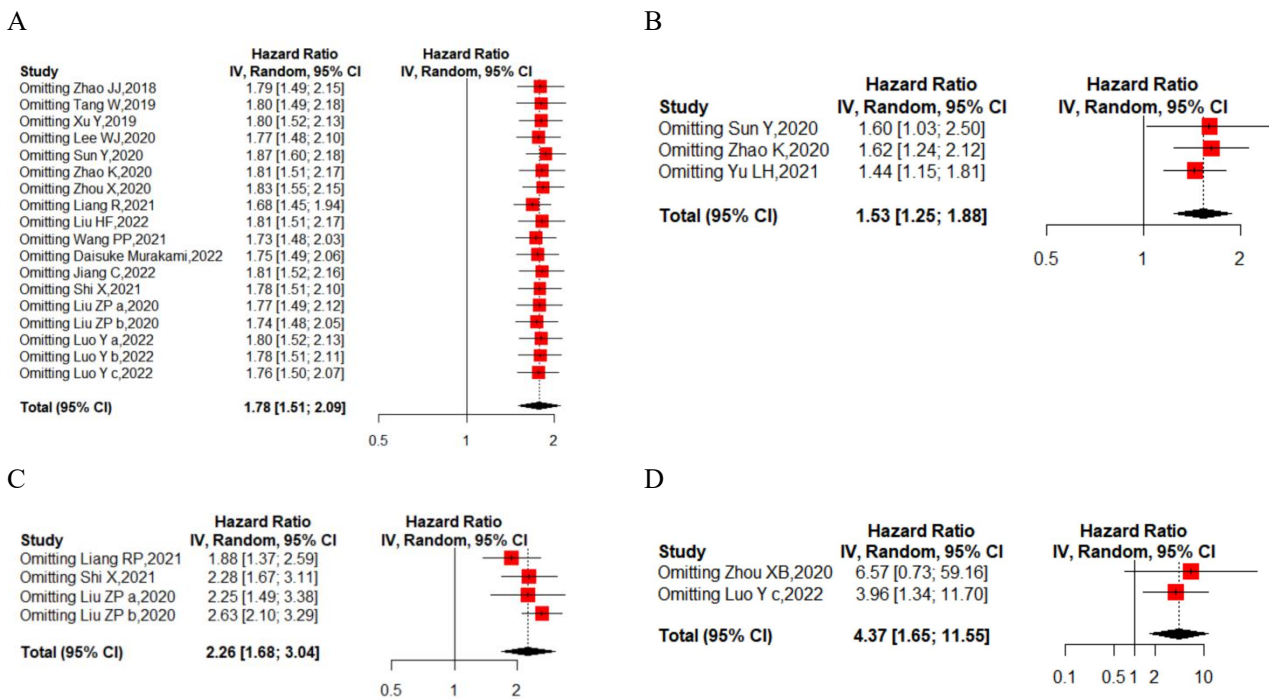

Figure 3 Sensitivity analysis plot(A.OS B.PFS C.RFS D.DFS)

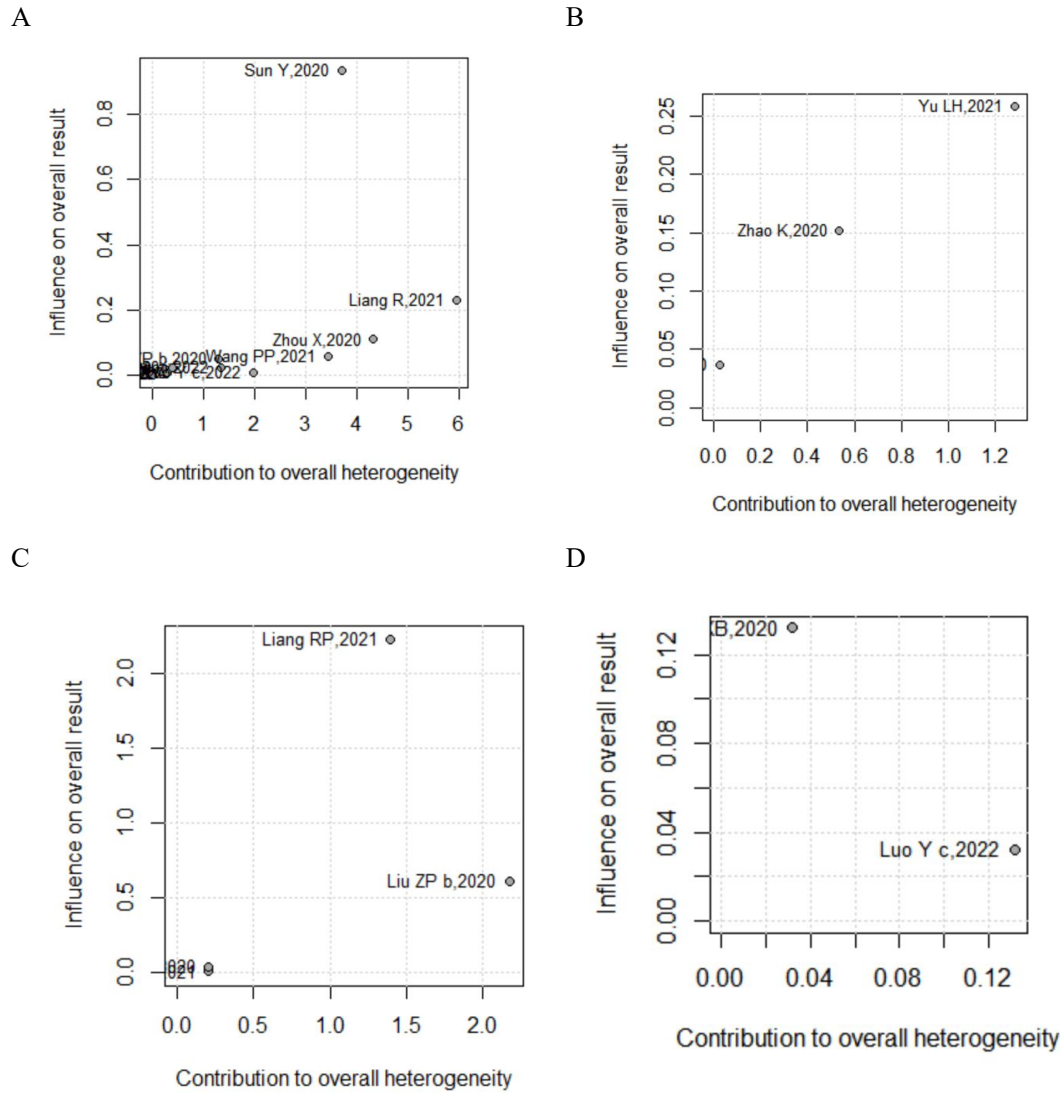

Figure 4 Baujat plot for heterogeneity analysis(A.OS B.PFS C.RFS D.DFS)

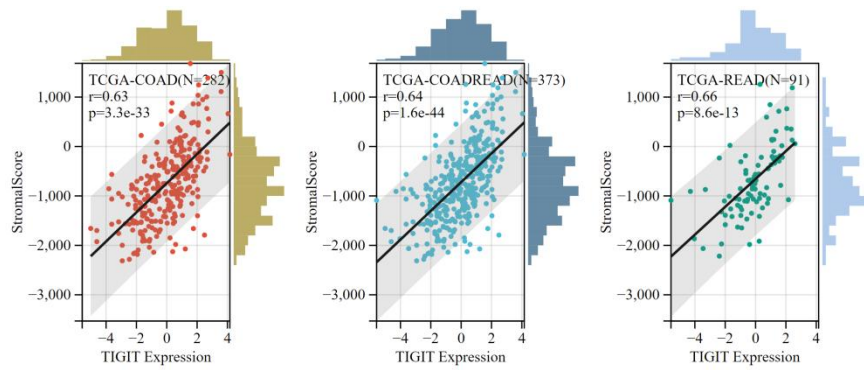



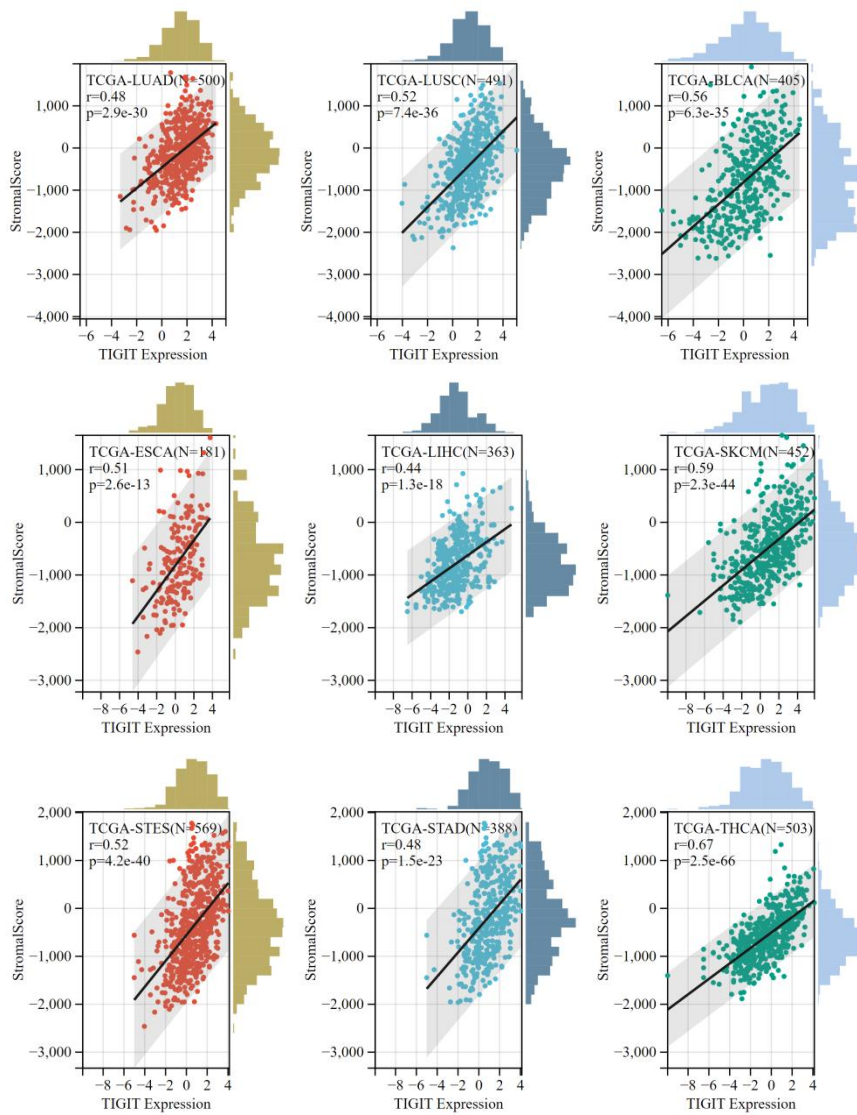

Figure 5 Correlation between TIGIT expression and StromalScore

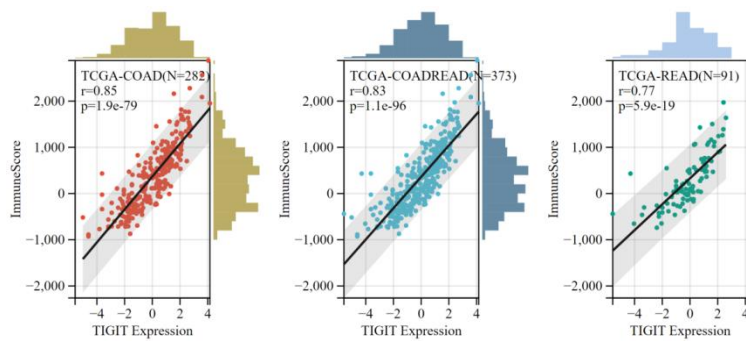

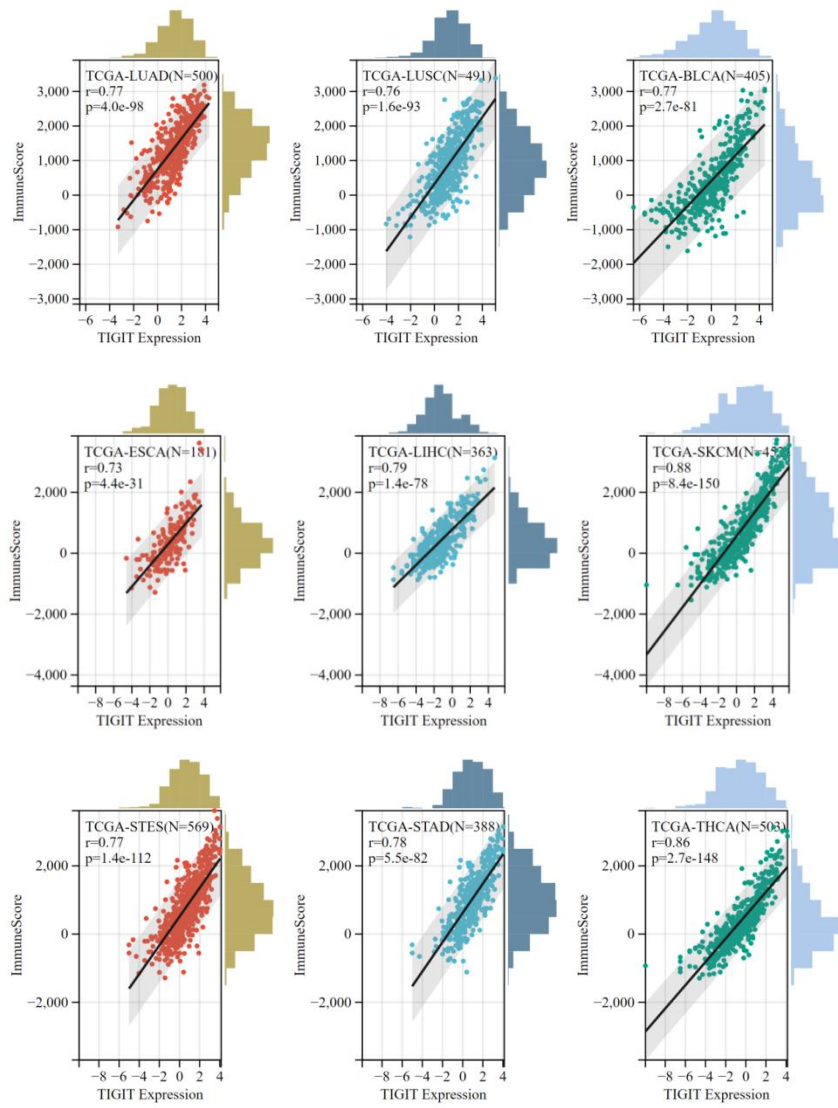

Figure 6 Correlation between TIGIT expression and ImmuneScore

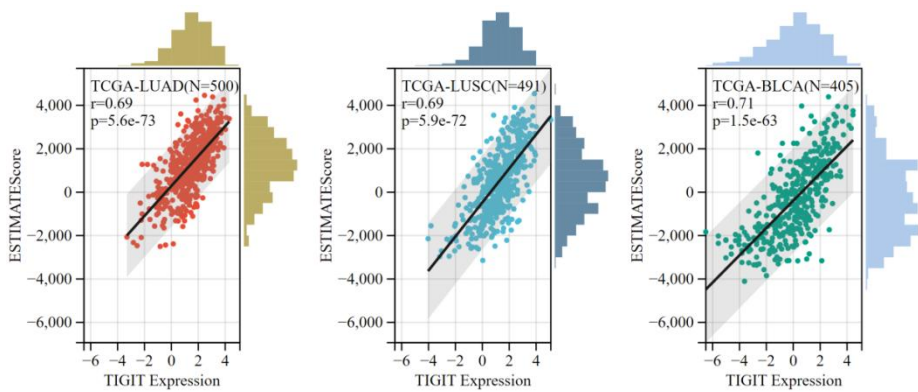

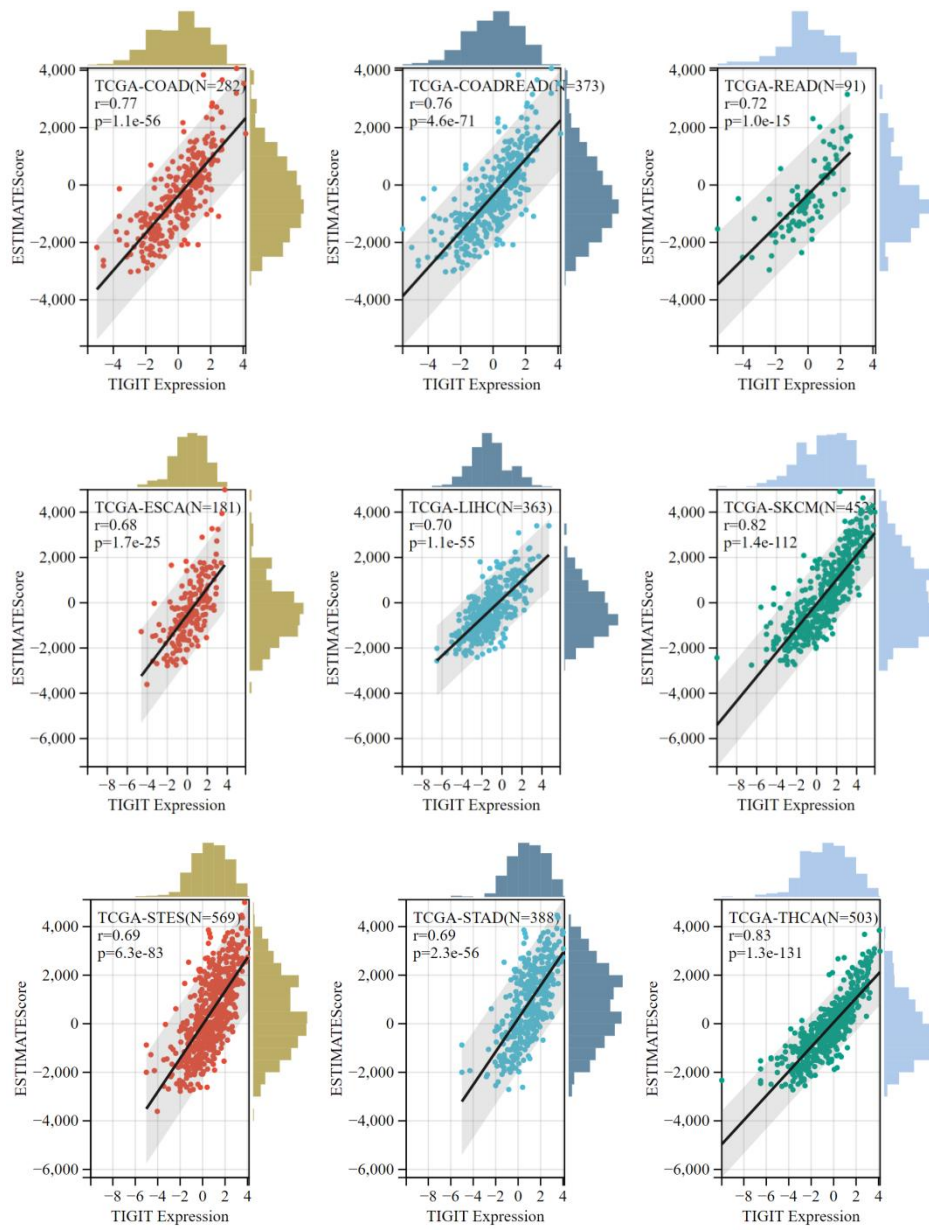

Figure 7 Correlation between TIGIT expression and ESTIMATE score
